# Supplementary material
Source: PubMed Central journal article supplement (PMC6204678)

**Supplemental Table 1.** Analytical reactivity and cross-reactivity analyses.

| Organism                    |            |          |                         | Source        | Test concentration             | Total positives by Singulex Clarity C. diff toxins A/B assay (n, number of replicates tested) |
|-----------------------------|------------|----------|-------------------------|---------------|--------------------------------|-----------------------------------------------------------------------------------------------|
| <i>C. difficile</i> strains |            |          |                         |               |                                |                                                                                               |
| ATCC Strain                 | Toxinotype | Ribotype | <i>tcdA/tcdB</i> status |               |                                |                                                                                               |
| 630                         | 0          | 012      | +/+                     | ATCC BAA-1382 | 3.7 x 10 <sup>8</sup> cells/mL | 3/3                                                                                           |
| N/A                         | IIIb       | 027      | +/+                     | ATCC BAA-1805 | 6.5 x 10 <sup>8</sup> cells/mL | 3/3                                                                                           |
| VPI 10463                   | 0          | 087      | +/+                     | ATCC 43255    | 6.9 x 10 <sup>8</sup> cells/mL | 3/3                                                                                           |
| W1194                       | 0          | 005      | +/+                     | ATCC 43594    | 6.3 x 10 <sup>8</sup> cells/mL | 3/3                                                                                           |
| 545                         | 0          | 012      | +/+                     | ATCC 43596    | 1.9 x 10 <sup>8</sup> cells/mL | 3/3                                                                                           |
| 2022                        | 0          | 001      | +/+                     | ATCC 43599    | 1.3 x 10 <sup>8</sup> cells/mL | 3/3                                                                                           |
| 2149                        | 0          | 014      | +/+                     | ATCC 43600    | 1.1 x 10 <sup>8</sup> cells/mL | 3/3                                                                                           |
| 870                         | 0          | 001      | +/+                     | ATCC 17857    | 1.7 x 10 <sup>8</sup> cells/mL | 3/3                                                                                           |
| 1253                        | 0          | 054      | -/+                     | ATCC 17858    | 4.1 x 10 <sup>8</sup> cells/mL | 3/3                                                                                           |
| 14797-2                     | 0          | 005      | +/+                     | ATCC 700792   | 2.1 x 10 <sup>8</sup> cells/mL | 3/3                                                                                           |
| Not ATCC strain             | 0          | 220      | +/+                     | ATCC BAA-1806 | 1.2 x 10 <sup>8</sup> cells/mL | 3/3                                                                                           |
| Not ATCC strain             | 0          | 020      | +/+                     | ATCC BAA-1808 | 7.5 x 10 <sup>8</sup> cells/mL | 3/3                                                                                           |
| Not ATCC strain             | 0          | 057      | +/+                     | ATCC BAA-1811 | 8.5 x 10 <sup>8</sup> cells/mL | 3/3                                                                                           |
| Not ATCC strain             | 0          | 002      | +/+                     | ATCC BAA 1813 | 8.6 x 10 <sup>8</sup> cells/mL | 3/3                                                                                           |
| Not ATCC strain             | 0          | 076      | +/+                     | ATCC BAA-1815 | 7.7 x 10 <sup>7</sup> cells/mL | 3/3                                                                                           |
| 4206                        | 0          | 207      | +/+                     | ATCC BAA-1872 | 4.2 x 10 <sup>8</sup> cells/mL | 3/3                                                                                           |
| LBM 0801058                 | XXII       | 251      | +/+                     | ATCC BAA-2155 | 5.8 x 10 <sup>8</sup> cells/mL | 3/3                                                                                           |
| LBM 0801040                 | 0          | 118      | +/+                     | ATCC BAA-2156 | 5.0 x 10 <sup>8</sup> cells/mL | 3/3                                                                                           |
| N/A                         | 0          | 014      | +/+                     | ATCC 43597    | 5.9 x 10 <sup>8</sup> cells/mL | 2/3                                                                                           |
| BDMS 18 AN                  | 0          | 001      | +/+                     | ATCC 51695    | 2.2 x 10 <sup>8</sup> cells/mL | 3/3                                                                                           |
| 3232                        | N/A        | 010      | -/-                     | ATCC BAA-1801 | 7.9 x 10 <sup>8</sup> cells/mL | 0/3                                                                                           |
| Not ATCC strain             | IIIc       | 027      | +/+                     | ATCC BAA-1803 | 7.8 x 10 <sup>8</sup> cells/mL | 3/3                                                                                           |
| Not ATCC strain             | 0          | 053      | +/+                     | ATCC BAA-1804 | 7.8 x 10 <sup>8</sup> cells/mL | 3/3                                                                                           |
| Not ATCC strain             | XII        | 024      | +/+                     | ATCC BAA-1812 | 8.1 x 10 <sup>8</sup> cells/mL | 3/3                                                                                           |
| 5325                        | V          | 078      | +/+                     | ATCC BAA-1875 | 7.2 x 10 <sup>8</sup> cells/mL | 3/3                                                                                           |
| 90556-M6S                   | 0          | 001      | +/+                     | ATCC 9689     | 6.8 x 10 <sup>8</sup> cells/mL | 2/2                                                                                           |
| 1470                        | VIII       | 017      | -/+                     | ATCC 43598    | 8.4 x 10 <sup>8</sup> cells/mL | 2/2                                                                                           |
| Not ATCC strain             | XXII       | 251      | +/-                     | ATCC BAA-1814 | 8.8 x 10 <sup>8</sup> cells/mL | 3/3                                                                                           |
| 4118                        | IIIb       | 027      | +/+                     | ATCC BAA-1870 | 7.7 x 10 <sup>8</sup> cells/mL | 3/3                                                                                           |

|                                 |     |     |     |                                   |                                |                                |
|---------------------------------|-----|-----|-----|-----------------------------------|--------------------------------|--------------------------------|
| 1351                            | N/A | 060 | -/- | ATCC 43593                        | 6.1 x 10 <sup>8</sup> cells/mL | 0/3                            |
| 7322                            | N/A | 031 | -/- | ATCC 43601                        | 1.3 x 10 <sup>7</sup> cells/mL | 0/3                            |
| 4111                            | 0   | 001 | +/+ | ATCC BAA-1871                     | 2.4 x 10 <sup>8</sup> cells/mL | 3/3                            |
| 5283                            | 0   | 053 | +/+ | ATCC BAA-1873                     | 1.4 x 10 <sup>8</sup> cells/mL | 3/3                            |
| 4205                            | 0   | 002 | +/+ | ATCC BAA-1874                     | 1.3 x 10 <sup>8</sup> cells/mL | 3/3                            |
| CCUG 20309                      | N/A | N/A | N/A | CCUG 26891                        | 1.6 x 10 <sup>8</sup> cells/mL | 3/3                            |
| CCUG 46469                      | N/A | N/A | N/A | CCUG 26893                        | 2.6 x 10 <sup>8</sup> cells/mL | 3/3                            |
| CCUG 64977                      | N/A | N/A | N/A | CCUG 26894                        | 3.0 x 10 <sup>8</sup> cells/mL | 3/3                            |
| <b>Aerobic bacteria</b>         |     |     |     |                                   |                                |                                |
|                                 |     |     |     | <i>Abiotrophia defectiva</i>      | ATCC 49176                     | 2.5 x 10 <sup>8</sup> cells/mL |
|                                 |     |     |     | <i>Acinetobacter baumannii</i>    | ATCC 19606                     | 5.5 x 10 <sup>8</sup> cells/mL |
|                                 |     |     |     | <i>Aeromonas hydrophila</i>       | ATCC 7966                      | 9.4 x 10 <sup>8</sup> cells/mL |
|                                 |     |     |     | <i>Alcaligenes faecalis</i>       | ATCC 15554                     | 7.0 x 10 <sup>8</sup> cells/mL |
|                                 |     |     |     | <i>Bacillus cereus</i>            | ATCC 13472                     | 7.4 x 10 <sup>8</sup> cells/mL |
|                                 |     |     |     | <i>Citrobacter freundii</i>       | ATCC 8090                      | 8.7 x 10 <sup>8</sup> cells/mL |
|                                 |     |     |     | <i>Edwardsiella tarda</i>         | ATCC 15947                     | 8.8 x 10 <sup>8</sup> cells/mL |
|                                 |     |     |     | <i>Enterobacter aerogenes</i>     | ATCC 13048                     | 5.3 x 10 <sup>8</sup> cells/mL |
|                                 |     |     |     | <i>Enterobacter cloacae</i>       | ATCC 13047                     | 8.7 x 10 <sup>8</sup> cells/mL |
|                                 |     |     |     | <i>Enterococcus faecalis vanB</i> | ATCC 51299                     | 8.0 x 10 <sup>8</sup> cells/mL |
|                                 |     |     |     | <i>Escherichia coli</i>           | ATCC 23511                     | 7.5 x 10 <sup>8</sup> cells/mL |
|                                 |     |     |     | <i>Escherichia coli O157:H7</i>   | ATCC 700927                    | 1.1 x 10 <sup>9</sup> cells/mL |
|                                 |     |     |     | <i>Plesiomonas shigelloides</i>   | CCUG 26892                     | 4.2 x 10 <sup>8</sup> cells/mL |
|                                 |     |     |     | <i>Proteus mirabilis</i>          | ATCC 25933                     | 9.8 x 10 <sup>8</sup> cells/mL |
|                                 |     |     |     | <i>Providencia alcalifaciens</i>  | ATCC 9886                      | 7.7 x 10 <sup>8</sup> cells/mL |
|                                 |     |     |     | <i>Pseudomonas aeruginosa</i>     | ATCC 10145                     | 1.0 x 10 <sup>7</sup> cells/mL |
|                                 |     |     |     | <i>Salmonella arizonae</i>        | ATCC 13314                     | 8.5 x 10 <sup>8</sup> cells/mL |
|                                 |     |     |     | <i>Salmonella enterica</i>        | ATCC 7001                      | 6.5 x 10 <sup>8</sup> cells/mL |
|                                 |     |     |     | <i>Salmonella typhimurium</i>     | ATCC 29630                     | 1 x 10 <sup>7</sup> cells/mL   |
|                                 |     |     |     | <i>Serratia liquefaciens</i>      | ATCC 27592                     | 8.7 x 10 <sup>8</sup> cells/mL |
|                                 |     |     |     | <i>Serratia marcescens</i>        | ATCC 13880                     | 8.2 x 10 <sup>8</sup> cells/mL |
|                                 |     |     |     | <i>Shigella boydii</i>            | ATCC 9207                      | 8.4 x 10 <sup>8</sup> cells/mL |
|                                 |     |     |     | <i>Shigella dysenteriae</i>       | ATCC 11835                     | 4.1 x 10 <sup>8</sup> cells/mL |
|                                 |     |     |     | <i>Shigella flexneri</i>          | ATCC 12022                     | 1.0 x 10 <sup>7</sup> cells/mL |
|                                 |     |     |     | <i>Shigella sonnei</i>            | CCUG 26896                     | 1.9 x 10 <sup>8</sup> cells/mL |
|                                 |     |     |     | <i>Staphylococcus aureus</i>      | ATCC 43300                     | 1.0 x 10 <sup>9</sup> cells/mL |
|                                 |     |     |     | <i>Staphylococcus epidermidis</i> | ATCC 14990                     | 6.8 x 10 <sup>8</sup> cells/mL |
|                                 |     |     |     | <i>Streptococcus agalactiae</i>   | ATCC 12973                     | 1.0 x 10 <sup>9</sup> cells/mL |
|                                 |     |     |     | <i>Vibrio parahaemolyticus</i>    | ATCC 17802                     | 5.5 x 10 <sup>8</sup> cells/mL |
| <b>Microaerophilic bacteria</b> |     |     |     |                                   |                                |                                |
|                                 |     |     |     | <i>Campylobacter coli</i>         | ATCC 43479                     | 1.8 x 10 <sup>8</sup> cells/mL |
|                                 |     |     |     | <i>Campylobacter jejuni</i>       | ATCC 33292                     | 1.1 x 10 <sup>8</sup> cells/mL |

|                                      |                              |                                               |     |
|--------------------------------------|------------------------------|-----------------------------------------------|-----|
| <i>Helicobacter pylori</i>           | ATCC 43504                   | 1.1 x 10 <sup>8</sup> cells/mL                | 0/3 |
| <b>Anaerobic bacteria</b>            |                              |                                               |     |
| <i>Clostridium bifermentans</i>      | ATCC 638                     | 9.2 x 10 <sup>8</sup> cells/mL                | 0/3 |
| <i>Bacteroides fragilis</i>          | ATCC 25285                   | 1.1 x 10 <sup>9</sup> cells/mL                | 0/3 |
| <i>Clostridium haemolyticum</i>      | ATCC 19398                   | 1.1 x 10 <sup>9</sup> cells/mL                | 1/3 |
| <i>Clostridium novyi</i>             | ATCC 19402                   | 7.8 x 10 <sup>8</sup> cells/mL                | 0/3 |
| <i>Clostridium orbiscindens</i>      | ATCC 49531                   | 4.0 x 10 <sup>8</sup> cells/mL                | 0/3 |
| <i>Clostridium perfringens</i>       | ATCC 13124                   | 1.2 x 10 <sup>9</sup> cells/mL                | 0/3 |
| <i>Clostridium scindens</i>          | ATCC 35704                   | 8.3 x 10 <sup>8</sup> cells/mL                | 0/3 |
| <i>Clostridium septicum</i>          | ATCC 12464                   | 9.6 x 10 <sup>8</sup> cells/mL                | 0/3 |
| <i>Clostridium sordellii</i>         | ATCC 9714                    | 2.3 x 10 <sup>6</sup> cells/mL                | 0/3 |
| <i>Clostridium sporogenes</i>        | ATCC 15579                   | 1.2 x 10 <sup>9</sup> cells/mL                | 0/3 |
| <i>Clostridium tetani</i>            | ATCC 19406                   | 1.0 x 10 <sup>7</sup> cells/mL                | 0/3 |
| <i>Klebsiella oxytoca</i>            | ATCC 33497                   | 5.0 x 10 <sup>8</sup> cells/mL                | 0/3 |
| <i>Lactobacillus acidophilus</i>     | ATCC 4356                    | 8.9 x 10 <sup>8</sup> cells/mL                | 0/3 |
| <i>Peptostreptococcus anaerobius</i> | ATCC 27337                   | 1.0 x 10 <sup>9</sup> cells/mL                | 0/3 |
| <i>Porphyromonas asaccharolytica</i> | ATCC 25260                   | 6.9 x 10 <sup>7</sup> cells/mL                | 0/3 |
| <i>Prevotella melaninogenica</i>     | ATCC 25845                   | 9.4 x 10 <sup>8</sup> cells/mL                | 0/3 |
| <i>Vibrio cholerae</i>               | ATCC 14035                   | 1.3 x 10 <sup>9</sup> cells/mL                | 0/3 |
| <i>Yersinia enterocolitica</i>       | ATCC 23715                   | 9.0 x 10 <sup>8</sup> cells/mL                | 0/3 |
| <b>Fungi</b>                         |                              |                                               |     |
| <i>Candida albicans</i>              | ATCC 10231                   | 1.4 x 10 <sup>8</sup> cells/mL                | 0/3 |
| <b>Viruses</b>                       |                              |                                               |     |
| Adenovirus                           | Zeptomatrix (Z)<br>0810084CF | 1 x 10 <sup>7</sup> TCID <sub>50</sub> /mL    | 0/3 |
| Coxsackie virus                      | Z 0810074CF                  | 1 x 10 <sup>7</sup> TCID <sub>50</sub> /mL    | 0/3 |
| Echovirus                            | Z 0810078CF                  | 1 x 10 <sup>7</sup> TCID <sub>50</sub> /mL    | 0/3 |
| Rotavirus                            | Z 0810041CF                  | 1 x 10 <sup>7</sup> TCID <sub>50</sub> /mL    | 0/3 |
| Astrovirus                           | Z 0810275CF                  | 1 x 10 <sup>5</sup> TCID <sub>50</sub> /mL    | 0/3 |
| Cytomegalovirus                      | Z 0810003CF                  | 1 x 10 <sup>5.55</sup> TCID <sub>50</sub> /mL | 0/3 |
| Norovirus Group I                    | Z 0810086CF                  | 1 x 10 <sup>5.39</sup> TCID <sub>50</sub> /mL | 0/3 |
| Norovirus Group II                   | Z 0810087CF                  | 1 x 10 <sup>5.15</sup> TCID <sub>50</sub> /mL | 0/3 |
| Enterovirus                          | Z 0810303CF                  | 1 x 10 <sup>6.34</sup> TCID <sub>50</sub> /mL | 0/3 |

\* Abbreviations used: ATCC, American Type Culture Collection; CCUG, Culture Collection, University of Göteborg, Sweden; TCID, Tissue culture infective dose.

**Supplemental Table 2.** Potential interference by common endogenous and exogenous substances when tested with the Singulex Clarity C. diff toxins A/B assay.

| Interfering substance  | Interfering substance concentration | Sample type (TcdA/TcdB concentration) | TcdA/TcdB concentration (mean, pg/mL) | Detected Events prime signal (mean) | Interference |
|------------------------|-------------------------------------|---------------------------------------|---------------------------------------|-------------------------------------|--------------|
| Mucin                  | 0 mg/mL                             | High-negative                         | 0.53                                  | 558.63                              | No           |
|                        | 3.5 mg/mL                           |                                       | 0.63                                  | 570.39                              |              |
|                        | 0 mg/mL                             | Low-positive                          | 6.03                                  | 1189.35                             |              |
|                        | 3.5 mg/mL                           |                                       | 5.83                                  | 1213.77                             |              |
| Human blood/Hemoglobin | 0% v/v                              | High-negative                         | 1.85                                  | 712.11                              | No           |
|                        | 50% v/v                             |                                       | 1.94                                  | 722.62                              |              |
|                        | 0% v/v                              | Low-positive                          | 10.50                                 | 1772.38                             |              |
|                        | 50% v/v                             |                                       | 9.72                                  | 1675.46                             |              |
| Barium sulfate         | 0% w/v                              | High-negative                         | 5.22                                  | 1113.47                             | No           |
|                        | 20% w/v                             |                                       | 5.54                                  | 1152.80                             |              |
|                        | 0% w/v                              | Low-positive                          | 18.33                                 | 2794.10                             |              |
|                        | 20% w/v                             |                                       | 16.81                                 | 2593.97                             |              |
| Loperamide HCl         | 0 mg/mL                             | High-negative                         | 4.95                                  | 1079.26                             | No           |
|                        | 0.1 mg/mL                           |                                       | 4.34                                  | 1005.78                             |              |
|                        | 0 mg/mL                             | Low-positive                          | 18.32                                 | 2792.48                             |              |
|                        | 0.1 mg/mL                           |                                       | 16.99                                 | 2618.37                             |              |
| Bismuth subsalicylate  | 0% v/v                              | High-negative                         | 4.23                                  | 994.09                              | No           |
|                        | 10% v/v                             |                                       | 4.93                                  | 1077.64                             |              |
|                        | 0% v/v                              | Low-positive                          | 17.52                                 | 2687.00                             |              |
|                        | 10% v/v                             |                                       | 15.88                                 | 2472.25                             |              |
| Lipids                 | 0 mg/mL                             | High-negative                         | 5.06                                  | 1092.79                             | No           |
|                        | 20 mg/mL                            |                                       | 3.53                                  | 907.74                              |              |
|                        | 0 mg/mL                             | Low-positive                          | 17.63                                 | 2701.70                             |              |
|                        | 20 mg/mL                            |                                       | 14.71                                 | 2318.96                             |              |
| Metronidazole          | 0 mg/mL                             | High-negative                         | -0.59                                 | 429.56                              | No           |
|                        | 12.5 mg/mL                          |                                       | -0.91                                 | 391.97                              |              |
|                        | 0 mg/mL                             | Low-positive                          | 1.95                                  | 723.45                              |              |
|                        | 12.5 mg/mL                          |                                       | 0.67                                  | 574.99                              |              |
|                        | 0 mg/mL                             | High-negative                         | 6.25                                  | 1322.83                             |              |
|                        | 6.25 mg/mL                          |                                       | 3.01                                  | 937.45                              |              |
|                        | 0 mg/mL                             | Low-positive                          | 15.63                                 | 2486.64                             |              |
|                        | 6.25 mg/mL                          |                                       | 14.61                                 | 2356.08                             |              |

|                                       |              |               |       |         |    |
|---------------------------------------|--------------|---------------|-------|---------|----|
|                                       | 0 mg/mL      | High-negative | 2.80  | 913.41  |    |
|                                       | 3.125 mg/mL  |               | 4.43  | 1100.50 |    |
|                                       | 0 mg/mL      | Low-positive  | 20.09 | 3055.49 |    |
|                                       | 3.125 mg/mL  |               | 19.36 | 2962.83 |    |
| Acetaminophen                         | 0 µmol/mL    | High-negative | 3.70  | 927.96  | No |
|                                       | 1.34 µmol/mL |               | 3.69  | 926.62  |    |
|                                       | 0 µmol/mL    | Low-positive  | 20.27 | 3048.87 |    |
|                                       | 1.34 µmol/mL |               | 17.96 | 2744.96 |    |
| Ibuprofen                             | 0 µmol/mL    | High-negative | 5.28  | 1120.30 | No |
|                                       | 2.43 µmol/mL |               | 5.89  | 1197.15 |    |
|                                       | 0 µmol/mL    | Low-positive  | 17.21 | 2647.40 |    |
|                                       | 2.43 µmol/mL |               | 17.50 | 2684.99 |    |
| Vancomycin                            | 0 mg/mL      | High-negative | 2.71  | 811.17  | No |
|                                       | 12.5 mg/mL   |               | 2.54  | 792.19  |    |
|                                       | 0 mg/mL      | Low-positive  | 15.32 | 2399.07 |    |
|                                       | 12.5 mg/mL   |               | 14.13 | 2243.61 |    |
| Stearic acid: Palmitic acid 1:1 ratio | 0% w/v       | High-negative | 1.28  | 742.51  | No |
|                                       | 40% w/v      |               | 3.02  | 938.47  |    |
|                                       | 0% w/v       | Low-positive  | 10.24 | 1743.20 | No |
|                                       | 40% w/v      |               | 9.85  | 1690.80 |    |

**Supplemental Table 3.** Quantitative analyses of the stability of *C. difficile* samples was performed using the Singulex Clarity *C. diff* toxins A/B assay in a) different storage conditions and time points, and b) after three freeze-thaw cycles.

a)

|                                | TcdA/TcdB concentration (pg/mL) |                 |         |         |         |         |         |         |         |
|--------------------------------|---------------------------------|-----------------|---------|---------|---------|---------|---------|---------|---------|
|                                | 20–25 °C                        |                 | 2–8 °C  |         | -70°C   |         |         |         |         |
|                                | Day 0 (<4 Hours)<br>Baseline    | Day 0 (8 Hours) | Day 2   | Week 1  | Week 1  | Week 2  | Week 3  | Month 3 | Month 6 |
| TcdA/TcdB-<br>positive samples | 1103.1                          | 12403.8         | 8556.3  | 11328.2 | 14579.7 | 13558.6 | 13380.6 | 25696.3 | 14207.6 |
|                                | 4090.0                          | 4111.7          | 7002.7  | 6278.8  | 6770.3  | 4792.4  | 6432.2  | 6463.2  | 6716.8  |
|                                | 15071.0                         | 8560.1          | 4329.5  | 4348.5  | 7582.1  | 7402.2  | 10095.1 | 10932.7 | 7197.8  |
|                                | 3701.5                          | 10469.2         | 3822.8  | 4981.9  | 4091.0  | 4447.7  | 4447.7  | 6036.6  | 4324.0  |
|                                | 19342.7                         | 20330.2         | 25981.9 | 16145.2 | 30599.0 | 28072.2 | 16750.2 | 27298.4 | 23572.0 |
| TcdA/TcdB-<br>negative samples | -2.0                            | -1.5            | 6.5     | -0.5    | -3.0    | -1.6    | 0.9     | 1.5     | 0.0     |
|                                | -0.2                            | -0.5            | 0.2     | 0.2     | -1.2    | -2.1    | 1.4     | 7.1     | 0.5     |
|                                | 5.3                             | 0.4             | -2.4    | -1.6    | -1.5    | -4.0    | 2.7     | 3.5     | 0.0     |
|                                | -0.6                            | 3.2             | -1.6    | -2.4    | 0.5     | -0.5    | 0.2     | 2.0     | 0.0     |
|                                | 2.0                             | 1.4             | -2.0    | -1.5    | 5.4     | -2.9    | 0.1     | 0.7     | 0.1     |

b)

|                                | TcdA/TcdB concentration (pg/mL) |                   |                    |                   |
|--------------------------------|---------------------------------|-------------------|--------------------|-------------------|
|                                | Day 0 (<4 Hours)<br>Baseline    | First freeze-thaw | Second freeze-thaw | Third freeze-thaw |
| TcdA/TcdB-<br>positive samples | 1103.1                          | 21112.4           | 12103.7            | 15288.9           |
|                                | 4090.0                          | 6445.7            | 5591.3             | 6720.3            |
|                                | 15071.0                         | 6189.4            | 5184.7             | 6009.7            |
|                                | 3701.5                          | 4346.1            | 3751.7             | 3558.5            |
|                                | 19342.7                         | 29124.9           | 20786.5            | 19587.2           |
| TcdA/TcdB-<br>negative samples | -2.0                            | -0.3              | -1.2               | -1.8              |
|                                | -0.2                            | -0.7              | -1.0               | -1.1              |
|                                | 5.3                             | -2.5              | -2.6               | -2.7              |
|                                | -0.6                            | -3.1              | -2.2               | -2.9              |
|                                | 2.0                             | -1.9              | -0.9               | -2.0              |

**Supplemental Figure 1.** *C. difficile* toxin concentration in stools containing 027 and non-027 strains.

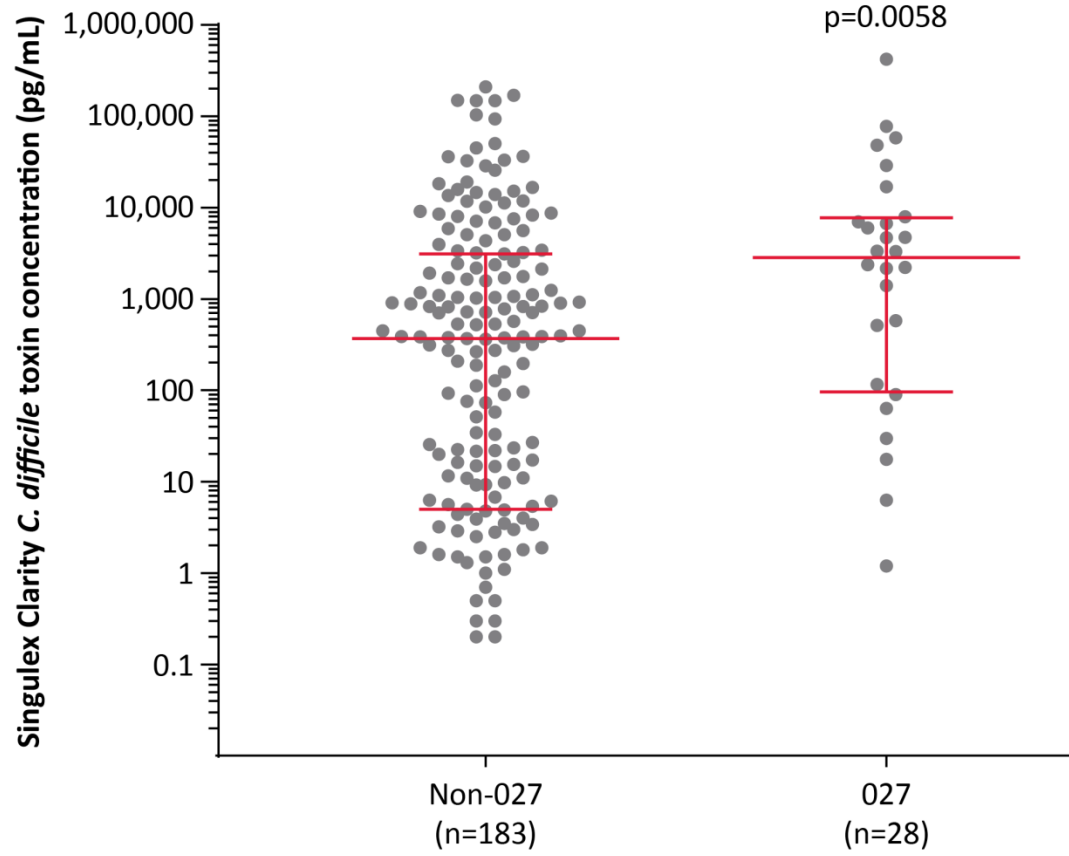

Supplement: zjm999096146s1.pdf [file zjm999096146s1.pdf]
